# Supplementary material
Source: publisher site journal article supplement (https://www.spandidos-publications.com/5868/downloadSupplementary)
Supplement: Supplementary file 1 [file downloadSupplementary]

Table SI. Abbreviations and full names of the terms from TCGA.

| Cohort        | Full name                                                        |
|---------------|------------------------------------------------------------------|
| TCGA-ACC      | Adrenocortical carcinoma                                         |
| TCGA-BLCA     | Bladder Urothelial Carcinoma                                     |
| TCGA-BRCA     | Breast invasive carcinoma                                        |
| TCGA-CESC     | Cervical squamous cell carcinoma and endocervical adenocarcinoma |
| TCGA-CHOL     | Cholangiocarcinoma                                               |
| TCGA-COAD     | Colon adenocarcinoma                                             |
| TCGA-COADREAD | Colon adenocarcinoma/Rectum adenocarcinoma Esophageal carcinoma  |
| TCGA-DLBC     | Lymphoid Neoplasm Diffuse Large B-cell Lymphoma                  |
| TCGA-ESCA     | Esophageal carcinoma                                             |
| TCGA-FPPP     | FFPE Pilot Phase II                                              |
| TCGA-GBM      | Glioblastoma multiforme                                          |
| TCGA-GBMLGG   | Glioma                                                           |
| TCGA-HNSC     | Head and Neck squamous cell carcinoma                            |
| TCGA-KICH     | Kidney Chromophobe                                               |
| TCGA-KIPAN    | Pan-kidney cohort (KICH+KIRC+KIRP)                               |
| TCGA-KIRC     | Kidney renal clear cell carcinoma                                |
| TCGA-KIRP     | Kidney renal papillary cell carcinoma                            |
| TCGA-LAML     | Acute Myeloid Leukemia                                           |
| TCGA-LGG      | Brain Lower Grade Glioma                                         |
| TCGA-LIHC     | Liver hepatocellular carcinoma                                   |
| TCGA-LUAD     | Lung adenocarcinoma                                              |
| TCGA-LUSC     | Lung squamous cell carcinoma                                     |
| TCGA-MESO     | Mesothelioma                                                     |
| TCGA-OV       | Ovarian serous cystadenocarcinoma                                |
| TCGA-PAAD     | Pancreatic adenocarcinoma                                        |
| TCGA-PCPG     | Pheochromocytoma and Paraganglioma                               |
| TCGA-PRAD     | Prostate adenocarcinoma                                          |
| TCGA-READ     | Rectum adenocarcinoma                                            |
| TCGA-SARC     | Sarcoma                                                          |
| TCGA-STAD     | Stomach adenocarcinoma                                           |
| TCGA-SKCM     | Skin Cutaneous Melanoma                                          |
| TCGA-STES     | Stomach and Esophageal carcinoma                                 |
| TCGA-TGCT     | Testicular Germ Cell Tumors                                      |
| TCGA-THCA     | Thyroid carcinoma                                                |
| TCGA-THYM     | Thymoma                                                          |
| TCGA-UCEC     | Uterine Corpus Endometrial Carcinoma                             |
| TCGA-UCS      | Uterine Carcinosarcoma                                           |
| TCGA-UVM      | Uveal Melanoma                                                   |

|            |                              |
|------------|------------------------------|
| TARGET-OS  | Osteosarcoma                 |
| TARGET-ALL | Acute Lymphoblastic Leukemia |
| TARGET-NB  | Neuroblastoma                |
| TARGET-WT  | High-Risk Wilms Tumor        |

TCGA, The Cancer Genome Atlas.

Table SII. Sequences of the primers.

| Gene                     | Primer sequence               |
|--------------------------|-------------------------------|
| E-cadherin forward       | 5'-ATTTTTCCTCGACACCCGAT-3'    |
| E-cadherin reverse       | 5'-TCCCAGGCGTAGACCAAGA-3'     |
| $\beta$ -catenin forward | 5'-AAAGCGGCTGTTAGTCACTGG-3'   |
| $\beta$ -catenin reverse | 5'-CGAGTCATTGCATACTGTCCAT-3'. |
| Vimentin forward         | 5'-AGTCCACTGAGTACCGGAGAC-3'   |
| Vimentin reverse         | 5'-CATTTACGCATCTGGCGTTC-3'    |
| N-cadherin forward       | 5'-TCAGGCGTCTGTAGAGGCTT-3'    |
| N-cadherin reverse       | 5'-ATGCACATCCTTCGATAAGACTG-3' |
| Snail forward            | 5'-TCGGAAGCCTAACTACAGCGA-3'   |
| Snail reverse            | 5'-AGATGAGCATTGGCAGCGAG-3'    |

Table SIII. Sequences of the siRNAs.

| siRNA             | Sequence              |
|-------------------|-----------------------|
| siTTC22#1 forward | CCAUGGCAACACUCUACAUTT |
| siTTC22#1 reverse | AUGUAGAGUGUUGCCAUGGTT |
| siTTC22#2 forward | CCAUUGAGAUUGCCAAGAATT |
| siTTC22#2 reverse | UUCUUGGCAAUCUCAAUGGTT |
| siTTC22#3 forward | CCAUUGGAACUGCAACAUTT  |
| siTTC22#3 reverse | AUGUUGCAGGUUCCAAUGGTT |
| siNC# forward     | UUCUCCGAACGUGUCACGUTT |
| siNC# reverse     | ACGUGACACGUUCGGAGAATT |

TTC22, tetratricopeptide repeat domain 22; NC, negative control; siRNA, small interfering RNA.
